# Supplementary material
Source: Springer Nature journal article supplement (https://www.springermedizin.de/resource/supplementary/13276_2011_21_MOESM2_ESM.pdf/9676592)

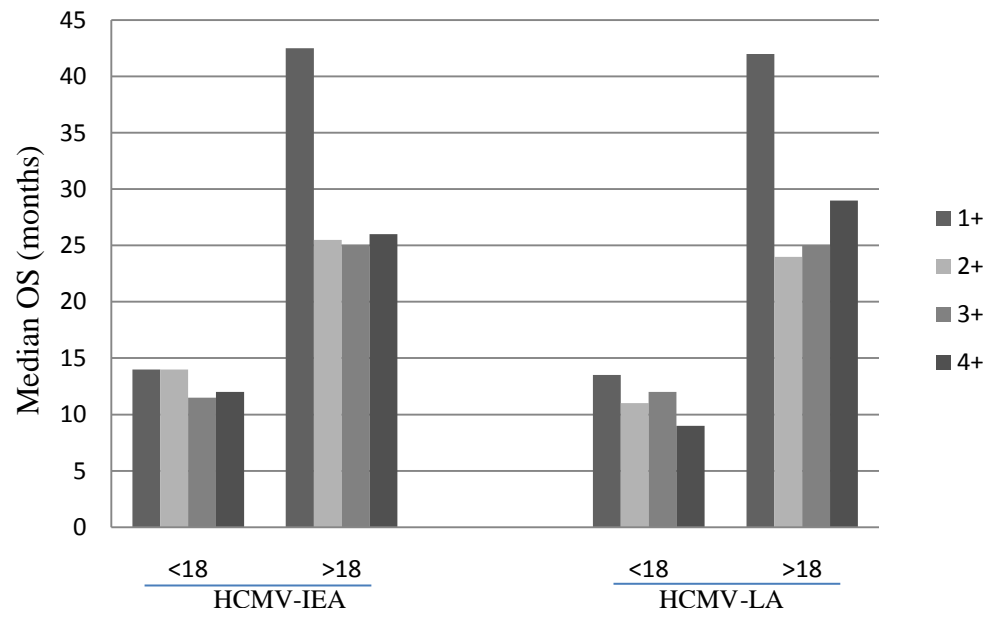

Supplement: MOESM2 [file 9676592]
